# Supplementary material
Source: Elsevier journal article supplement (https://comptes-rendus.academie-sciences.fr/biologies/article/10.1016/j.crvi.2013.05.005/file/attach/mmc1.pdf)
Supplement: mmc1 [file mmc1.pdf]

*Supplementary material to:*

“Resurrection of New Caledonian maskray *Neotrygon trigonoides* from synonymy with *Neotrygon kublii* (Myliobatoidei: Dasyatidae), based on cytochrome-oxidase I gene sequences and spotting patterns”

by Philippe Borsa, Wei-Jen Chen, Irma S. Arlyza, Jean-Dominique Durand, Mark G. Meekan and Kang-Ning Shen

Fig. S1 here appended

Fig. S2 here appended

#### *References*

Castelnau F. de (1873) Contribution to the ichthyology of Australia, Proc. Zool. Acclim. Soc. Victoria 2, 37-158.

Last P.R., White W.T. (2008) Resurrection of the genus *Neotrygon* Castelnau (Myliobatoidei: Dasyatidae) with the description of *Neotrygon picta* sp. nov., a new species from northern Australia. In Last P.R., White W.T., Pogonoski J.J. (eds.), Descriptions of new Australian Chondrichthyans. CSIRO Mar. Atm. Res. Pap. 22, CSIRO, Hobart, pp. 315-325.

Müller J, Henle J. 1841. Systematische Beschreibung der Plagiostomen, mit sechzig Steindrucktafeln. Veit und Comp., Berlin, xxii+200 p., 60 pl.

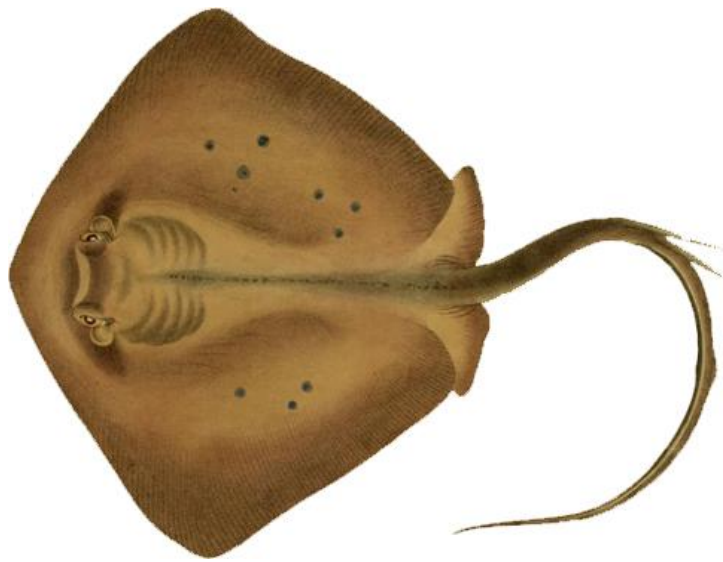

A

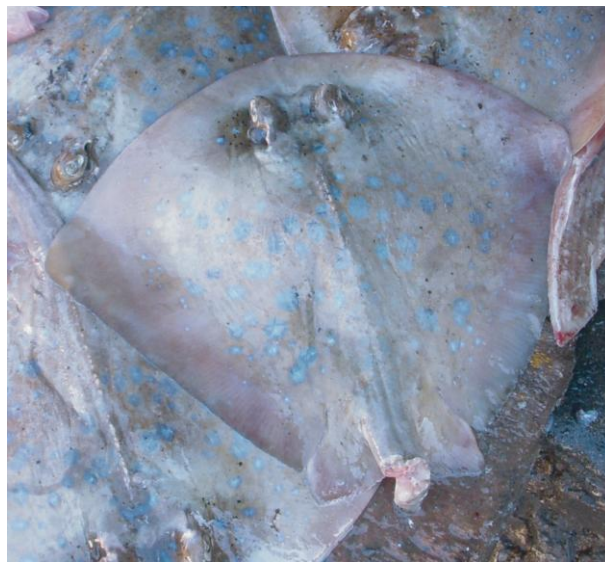

B

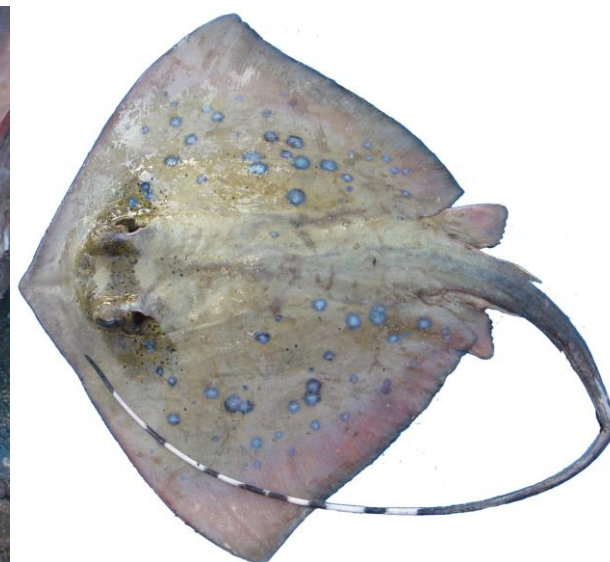

C

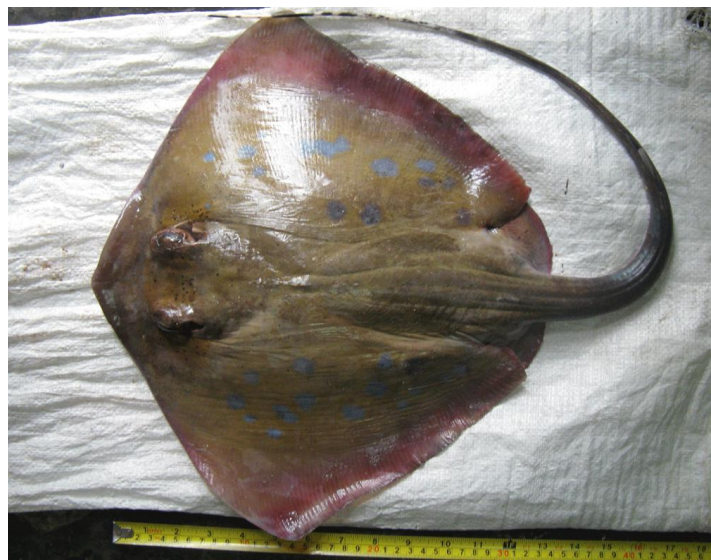

D

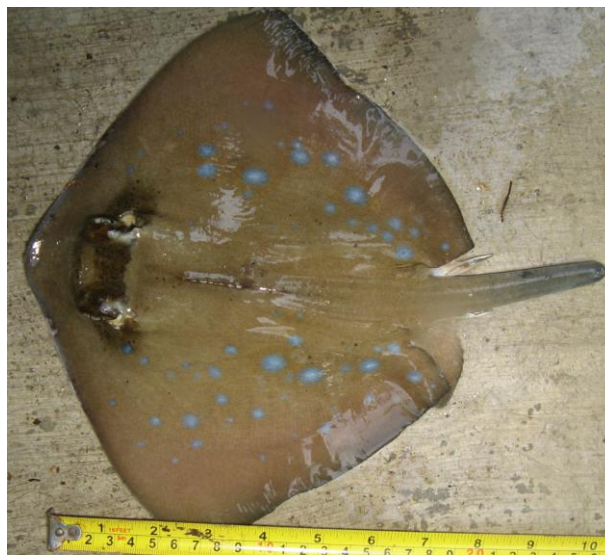

E

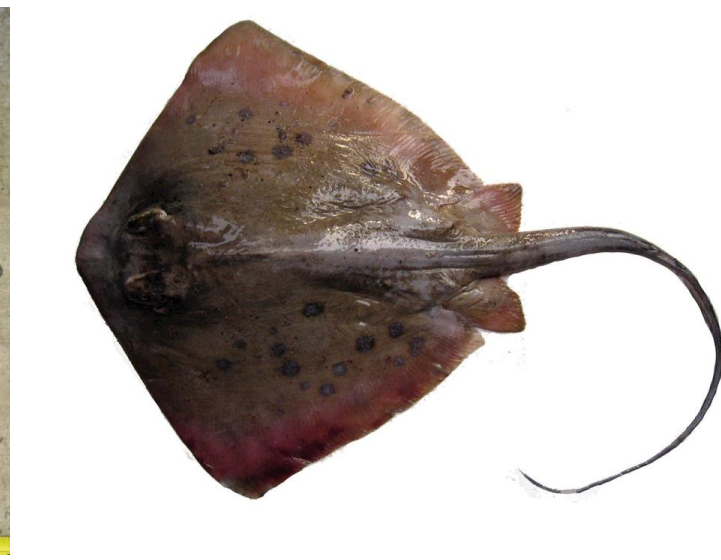

F

**Fig. S1** Blue-spotted maskray, *Neotrygon kuhlii* specimens examined for variation in spotting patterns. **A.** *N. kuhlii*, specimen presented Pl. 51 of Müller and Henle (1841), possibly one of the three syntypes (from India or New Guinea or Vanikoro). **B.** *N. kuhlii*, specimen Zan 1 from Mkoani, Pemba Island, Tanzania ( $05^{\circ}21'S$   $39^{\circ}38'E$ ), 26 May 2010 (J.-D.D.). **C.** *N. kuhlii*, specimen ME-3 (MZB 20843 = LIPI 4406) from Meulaboh, Aceh ( $04^{\circ}07'N$   $96^{\circ}08'E$ ), April 2009 (I.S.A.). **D.** *N. kuhlii*, specimen MSKL 3 (MZB 20847 = LIPI 4401) from Perbaungan, Malacca Strait ( $03^{\circ}39'N$   $98^{\circ}59'E$ ), December 2009 (I.S.A.). **E.** *N. kuhlii*, specimen DK-PR (MZB 20851 = LIPI 4402) from Pulau Pari, Java Sea, December 2008. **F.** *N. kuhlii* specimen PB 2 (MZB 20852 = LIPI 4410) from Pulau Pabelokan, Java Sea ( $05^{\circ}27'S$   $106^{\circ}29'E$ ), August 2009 (I.S.A.).

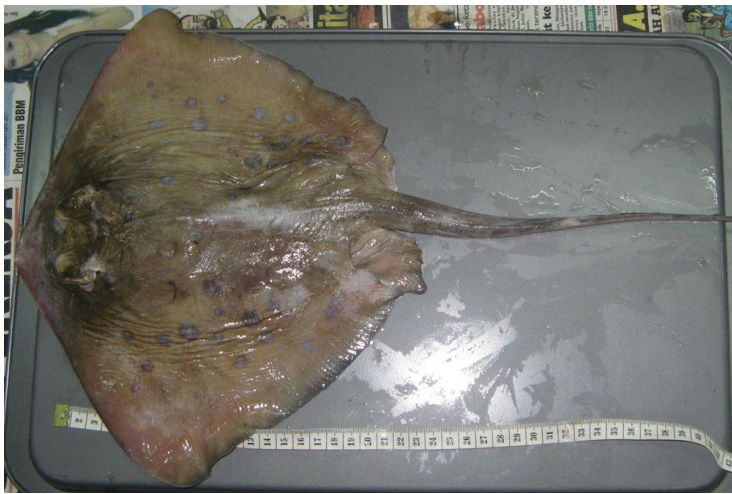**G**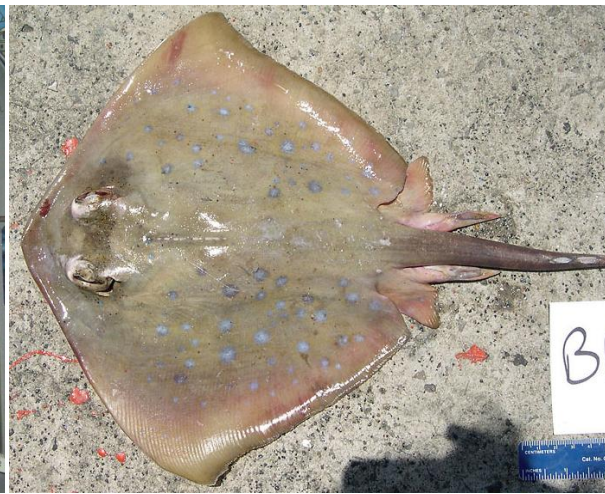**H**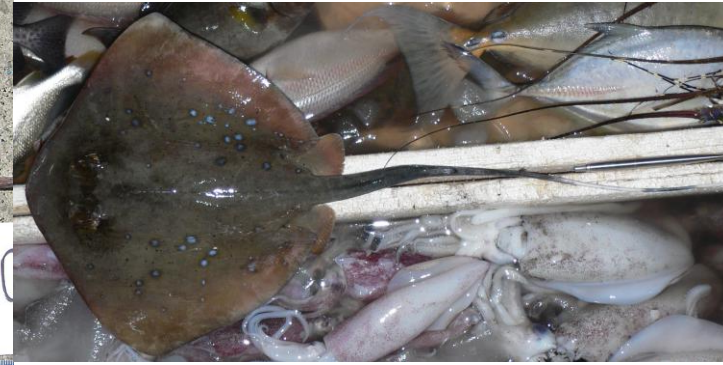**I**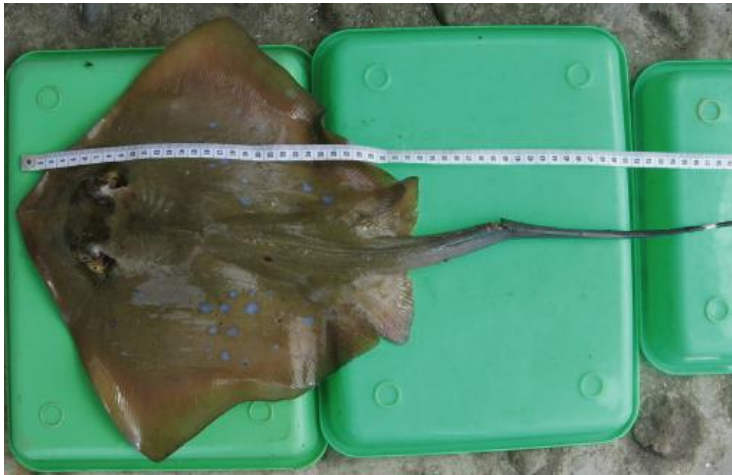**J**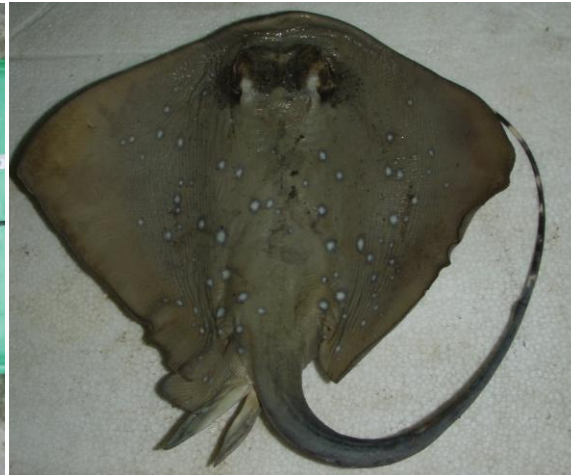**K**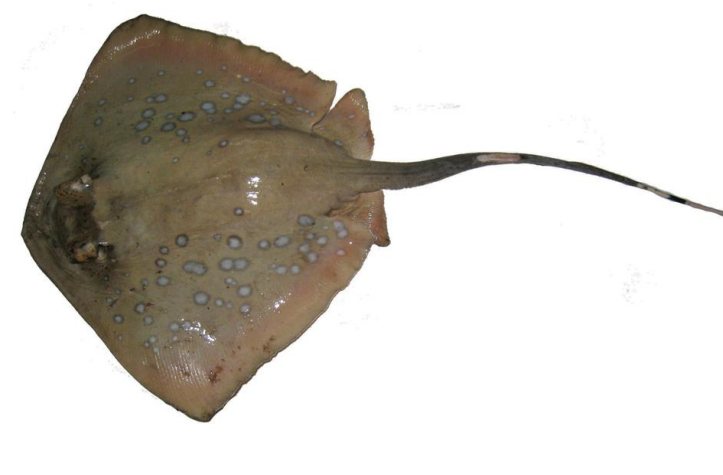**L**

**Fig. S1** (continued). **G.** *N. kuhlii* specimen PN 5 (MZB 20850 = LIPI 4399) from Pulau Peniki, Java Sea ( $05^{\circ}46'S$   $106^{\circ}38'E$ ), March 2009 (I.S.A.). **H.** *N. kuhlii* specimen BO-424 from Tanjung Manis, Sarawak, South China Sea ( $02^{\circ}07'N$   $111^{\circ}19'E$ ), April 2004 (photograph downloaded from: [http://tapewormdb.uconn.edu/index.php/hosts/specimen\\_details/elasmobranch/1483/0](http://tapewormdb.uconn.edu/index.php/hosts/specimen_details/elasmobranch/1483/0)). **I.** *N. kuhlii* specimen NK\_K\_BL from Kedonganan Bay, Bali ( $08^{\circ}44'S$   $115^{\circ}11'E$ ), 31 January 2008 (P.B.). **J.** *N. kuhlii*, specimen AM-1 (MZB 20864 = LIPI 4400) from Ambon, Banda Sea ( $03^{\circ}40'S$   $128^{\circ}11'E$ ), October 2008. **K.** *N. kuhlii*, specimen ARA-1 (MZB 20866 = LIPI 4405) from Kei Islands in the Arafura Sea ( $\sim 07^{\circ}37'S$   $\sim 135^{\circ}20'E$ ), 08 April 2009 (A. Kusnadi). **L.** *N. kuhlii*, specimen BK-5 (MZB 20867 = LIPI 4408) from Biak Island, West Papua ( $00^{\circ}58'S$   $136^{\circ}16'E$ ), May 2009 (Alvi).

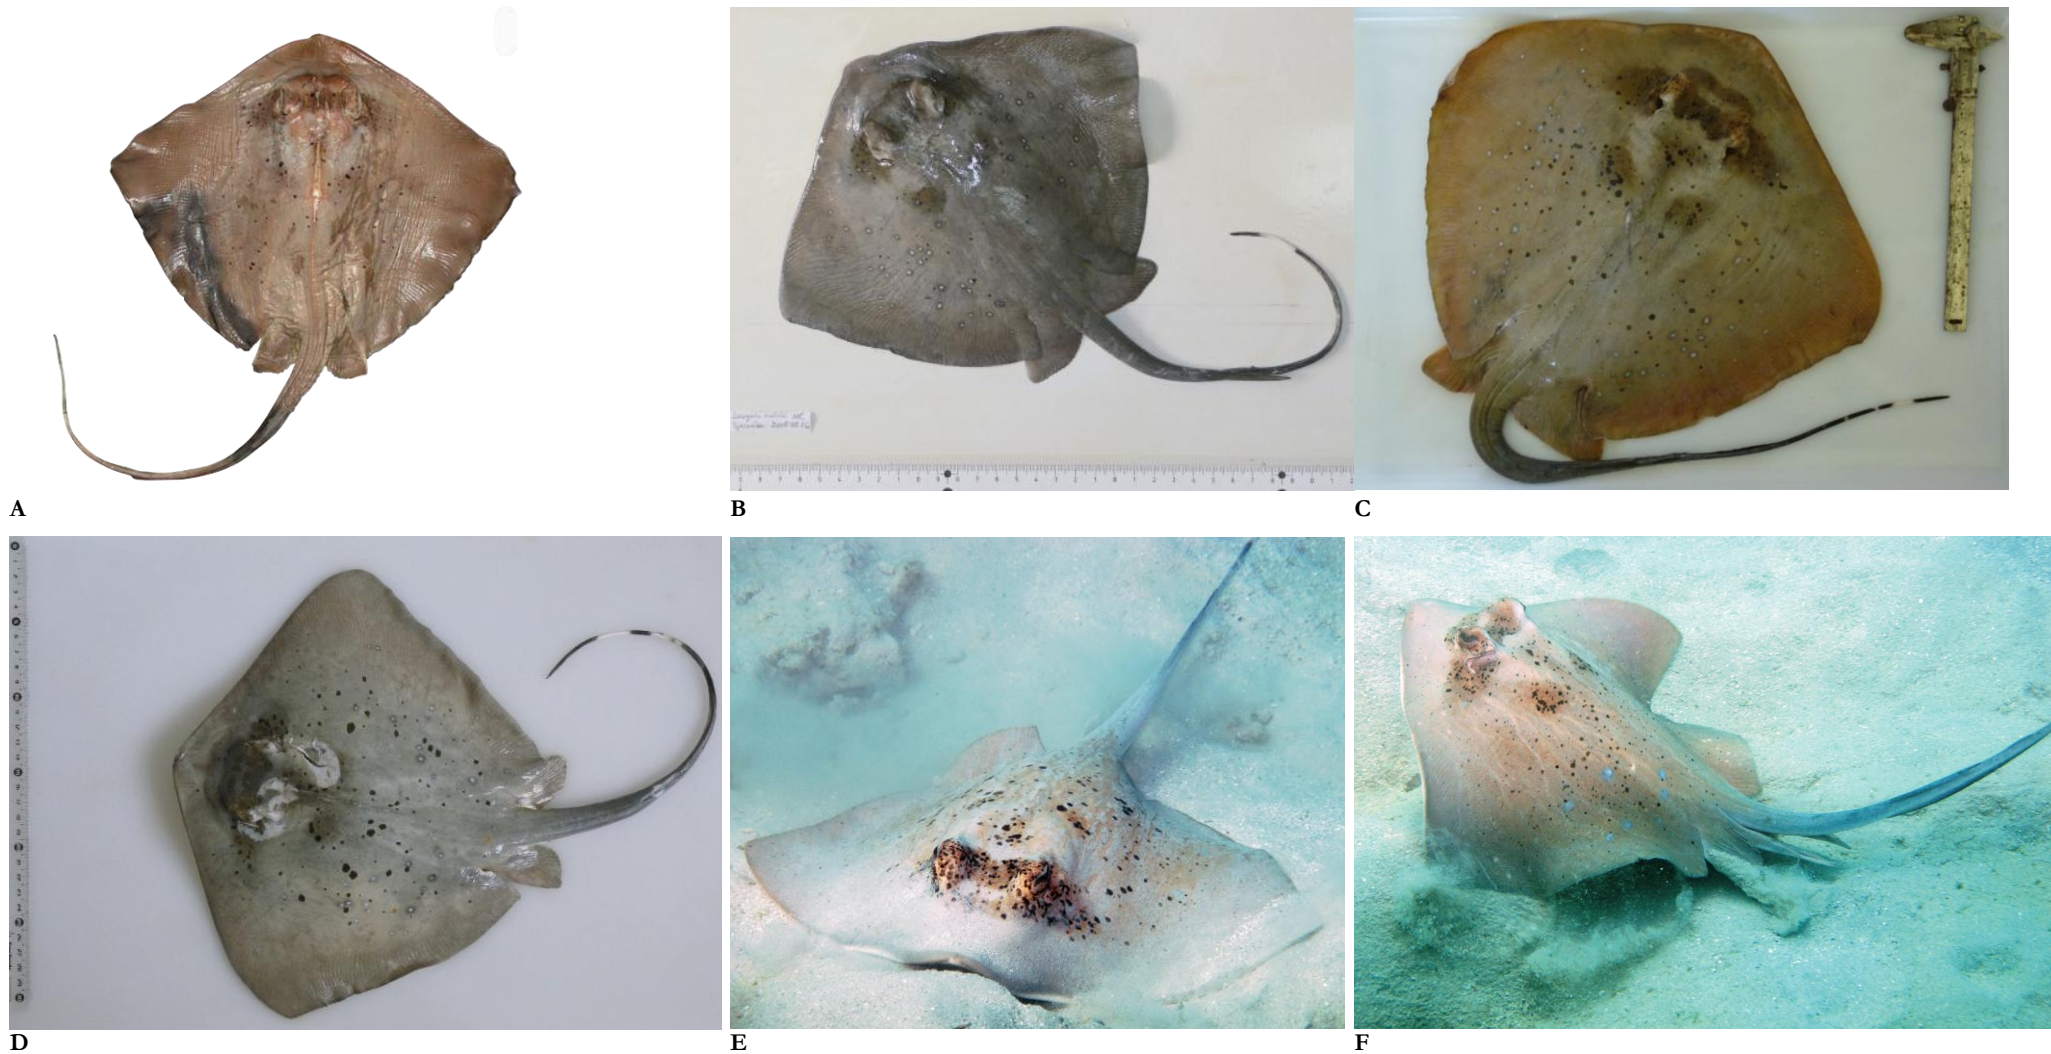

**Fig. S2.** *Neotrygon trigonoides*. Photographs of New Caledonian specimens analyzed for spotting patterns and additional underwater photographs of individuals sighted underwater at Lizard Island, northern Great Barrier Reef. **A.** Holotype of *Neotrygon trigonoides* (NMV 51684 = A5255): male, 182 mm DW, New Caledonia, examined by F. de Castelnau (Castelnau 1873) (Fig. 5B of Last and White 2008). **B.** *N. trigonoides* specimen deposited at the Australian National Fish Collection, CSIRO (uncat.; female, 225 mm disc width), from Saint Vincent Bay (21°56'S 165°55'E) 16 August 2008; fisherman: Patrick Morlet; formalin/alcohol-preserved specimen sent by PB to Alistair Graham, CSIRO, Hobart, on 14 August 2009 (P.B.). **C.** *N. trigonoides* specimen MNHN 2009-0823 (female, 350 mm DW) from Saint Vincent Bay (21°57'S 166°02'E), 07 March 2009; fisherman: Patrick Morlet (P.B.). **D.** *N. trigonoides* specimen IRDN 20090816 (male, 302 mm DW) from Saint Vincent Bay (21°57'S 166°02'E) 16 August 2009; fisherman: Patrick Morlet (P.B.). **E, F.** Underwater photographs of two males sighted at Lizard Island (14°41'S 145°27'E), 01 January 2013 (M.G.M.).
